# Supplementary material for: Connecting the Dots: Assessing Landscape Connectivity Algorithms for Biodiversity Conservation
Source: Research Square preprint supplement (doi:10.21203/rs.3.rs-3850342/v1), 2024-01-23
Supplement: Supplementary file 1 [file 108e17735351ca33c5407378.xlsx]

## Sheet: Sheet1
Table 2. Disperser properties of random walkers in the CRW model.
Disperser type	Stepsize (km)	Standard dev. of angle (degrees out of 360º)	Number of steps per disperser	Max. dispersal path lenght (km)
1	0.1	20	50	5
2	0.1	20	100	10
3	0.1	20	200	20
4	0.1	10	50	5
5	0.1	10	100	10
6	0.1	10	200	20
