# Supplementary material for: Connecting the Dots: Assessing Landscape Connectivity Algorithms for Biodiversity Conservation
Source: Research Square preprint supplement (doi:10.21203/rs.3.rs-3850342/v1), 2024-01-23
Supplement: Supplementary file 2 [file 148fdcb710a950295e8202c4.xlsx]

## Sheet: Sheet1
Table 3. Best algorithm to mimic random walk in all 36 landscape-disperser combinations.
Rank	Method	Mean R2	Minimum R2	Maximum R2	#Best	Algorithm Description (*)
1	CRD-lim	0.917513	0.80928	0.992194	27	Truncated Constant ⋅ Diameter/Distance
2	CAD-lim	0.875454	0.718317	0.991749	0	Truncated Constant ⋅ Area/Distance
3	PIE-lim	0.863589	0.703613	0.990397	1	Truncated Pie slice
4	C/D-lim	0.824696	0.611957	0.960887	0	Truncated Constant/Distance
5	EXP-lim	0.745427	0.184873	0.990728	5	Truncated Area ⋅ exp(-Constant ⋅ Distance)
6	EXP	0.743863	0.184873	0.985911	3	Area ⋅ exp(-Constant ⋅Distance)
7	CRD	0.531342	0.203162	0.798739	0	Constant ⋅ Diameter/Distance
8	CAD	0.497547	0.126792	0.78952	0	Constant ⋅ Area/Distance
9	C/D	0.48296	0.233841	0.742814	0	Constant/Distance
10	PIE	0.0995682	-7.06024	0.774272	0	Pie slice
* Truncated: after a certain inter-patch distance dmax the model is set to zero connectivity
						⋅⋅
