# Supplementary material for: Connecting the Dots: Assessing Landscape Connectivity Algorithms for Biodiversity Conservation
Source: Research Square preprint supplement (doi:10.21203/rs.3.rs-3850342/v1), 2024-01-23
Supplement: Supplementary file 3 [file bc3a01891f1e831a785f432b.xlsx]

## Sheet: Sheet1
Table 4. The three best algorithms to fit the correlated random walk model (CRW) in 36 landscape-disperser combinations.
Case	Landscape				Disperser type random walk				Best fitting algorithms
	#Patches	Random	% habitat		#steps	angle	max. path		Best	R2 best		Second best	R2 second		Third best	R2 Third
		type				(degree)	length (km)		Algorithm	Algorithm		Algorithm	best Algorithm		Algorithm	best Algorithm
1	10	A	5		50	10	5		EXP-lim	0.943		EXP	0.915		CRD-lim	0.872
2	10	B	5		50	10	5		EXP	0.948		EXP-lim	0.948		CRD-lim	0.913
3	10	A	5		50	20	5		EXP-lim	0.97		EXP	0.952		CRD-lim	0.809
4	10	B	5		50	20	5		CRD-lim	0.992		CAD-lim	0.992		EXP-lim	0.991
5	10	A	5		100	10	10		CRD-lim	0.958		PIE-lim	0.927		CAD-lim	0.895
6	10	B	5		100	10	10		CRD-lim	0.966		CAD-lim	0.954		PIE-lim	0.922
7	10	A	5		100	20	10		EXP	0.936		EXP-lim	0.936		PIE-lim	0.857
8	10	B	5		100	20	10		EXP	0.922		EXP-lim	0.922		CRD-lim	0.911
9	10	A	5		200	10	20		CRD-lim	0.931		CAD-lim	0.866		PIE-lim	0.832
10	10	B	5		200	10	20		CRD-lim	0.957		CAD-lim	0.941		C/D-lim	0.914
11	10	A	5		200	20	20		CRD-lim	0.919		EXP	0.865		EXP-lim	0.865
12	10	B	5		200	20	20		CRD-lim	0.924		CAD-lim	0.914		C/D-lim	0.897
13	20	C	10		50	10	5		PIE-lim	0.947		CRD-lim	0.941		CAD-lim	0.927
14	20	D	10		50	10	5		CRD-lim	0.966		PIE-lim	0.96		CAD-lim	0.936
15	20	C	10		50	20	5		EXP-lim	0.962		EXP	0.961		CRD-lim	0.917
16	20	D	10		50	20	5		CRD-lim	0.954		PIE-lim	0.952		EXP	0.946
17	20	C	10		100	10	10		CRD-lim	0.93		PIE-lim	0.919		CAD-lim	0.904
18	20	D	10		100	10	10		CRD-lim	0.914		PIE-lim	0.904		CAD-lim	0.876
19	20	C	10		100	20	10		CRD-lim	0.886		CAD-lim	0.857		C/D-lim	0.847
20	20	D	10		100	20	10		CRD-lim	0.943		CAD-lim	0.903		C/D-lim	0.874
21	20	C	10		200	10	20		CRD-lim	0.909		CAD-lim	0.871		PIE-lim	0.87
22	20	D	10		200	10	20		CRD-lim	0.912		PIE-lim	0.872		CAD-lim	0.87
23	20	C	10		200	20	20		CRD-lim	0.912		CAD-lim	0.877		C/D-lim	0.863
24	20	D	10		200	20	20		CRD-lim	0.901		CAD-lim	0..861		C/D-lim	0.84
25	40	E	20		50	10	5		CRD-lim	0.949		PIE-lim	0.946		CAD-lim	0.915
26	40	F	20		50	10	5		CRD-lim	0.942		PIE-lim	0.94		CAD-lim	0.897
27	40	E	20		50	20	5		EXP-lim	0.948		EXP	0.945		PIE-lim	0.919
28	40	F	20		50	20	5		EXP-lim	0.946		EXP-lim	0.946		CRD-lim	0.919
29	40	E	20		100	10	10		CRD-lim	0.919		PIE-lim	0.91		CAD-lim	0.88
30	40	F	20		100	10	10		CRD-lim	0.913		PIE-lim	0.908		CAD-lim	0.873
31	40	E	20		100	20	10		CRD-lim	0.909		EXP	0.877		EXP-lim	0.877
32	40	F	20		100	20	10		CRD-lim	0.902		EXP	0.862		EXP-lim	0.862
33	40	E	20		200	10	20		CRD-lim	0.9		PIE-lim	0.872		CAD-lim	0.857
34	40	F	20		200	10	20		CRD-lim	0.886		PIE-lim	0.869		CAD-lim	0.848
35	40	E	20		200	20	20		CRD-lim	0.887		CAD-lim	0.839		EXP	0.821
36	40	F	20		200	20	20		CRD-lim	0.897		CAD-lim	0.846		C/D-lim	0.793
