# Supplementary material for: Connecting the Dots: Assessing Landscape Connectivity Algorithms for Biodiversity Conservation
Source: Research Square preprint supplement (doi:10.21203/rs.3.rs-3850342/v1), 2024-01-23
Supplement: Supplementary file 4 [file fc227561aa5999604b0c1a96.docx]

Table 1. Six random landscapes with contrasting habitat cover, patch number and random configuration (A and B).

| Landscape  Number | Habitat  Cover % | Number of  Habitat Patches | Random Patch Area Range (km-2) | Random Patch  Configuration |
| --- | --- | --- | --- | --- |
| 1A | 5 | 10 | 0-10 | Sequence A |
| 1B | 5 | 10 | 0-10 | Sequence B |
| 2C | 10 | 20 | 0-10 | Sequence C |
| 2D | 10 | 20 | 0-10 | Sequence D |
| 3E | 20 | 40 | 0-10 | Sequence E |
| 3F | 20 | 40 | 0-10 | Sequence F |
